# Supplementary material for: Exploiting V-Gene Bias for Rapid, High-Throughput Monoclonal Antibody Isolation from Horses
Source: Viruses. 2022 Sep 30;14(10):2172. doi: 10.3390/v14102172 (PMC9609571; doi:10.3390/v14102172)
Supplement: Supplementary file 1 [file viruses-14-02172-s001.zip › viruses-1862361-supplementary.pdf]

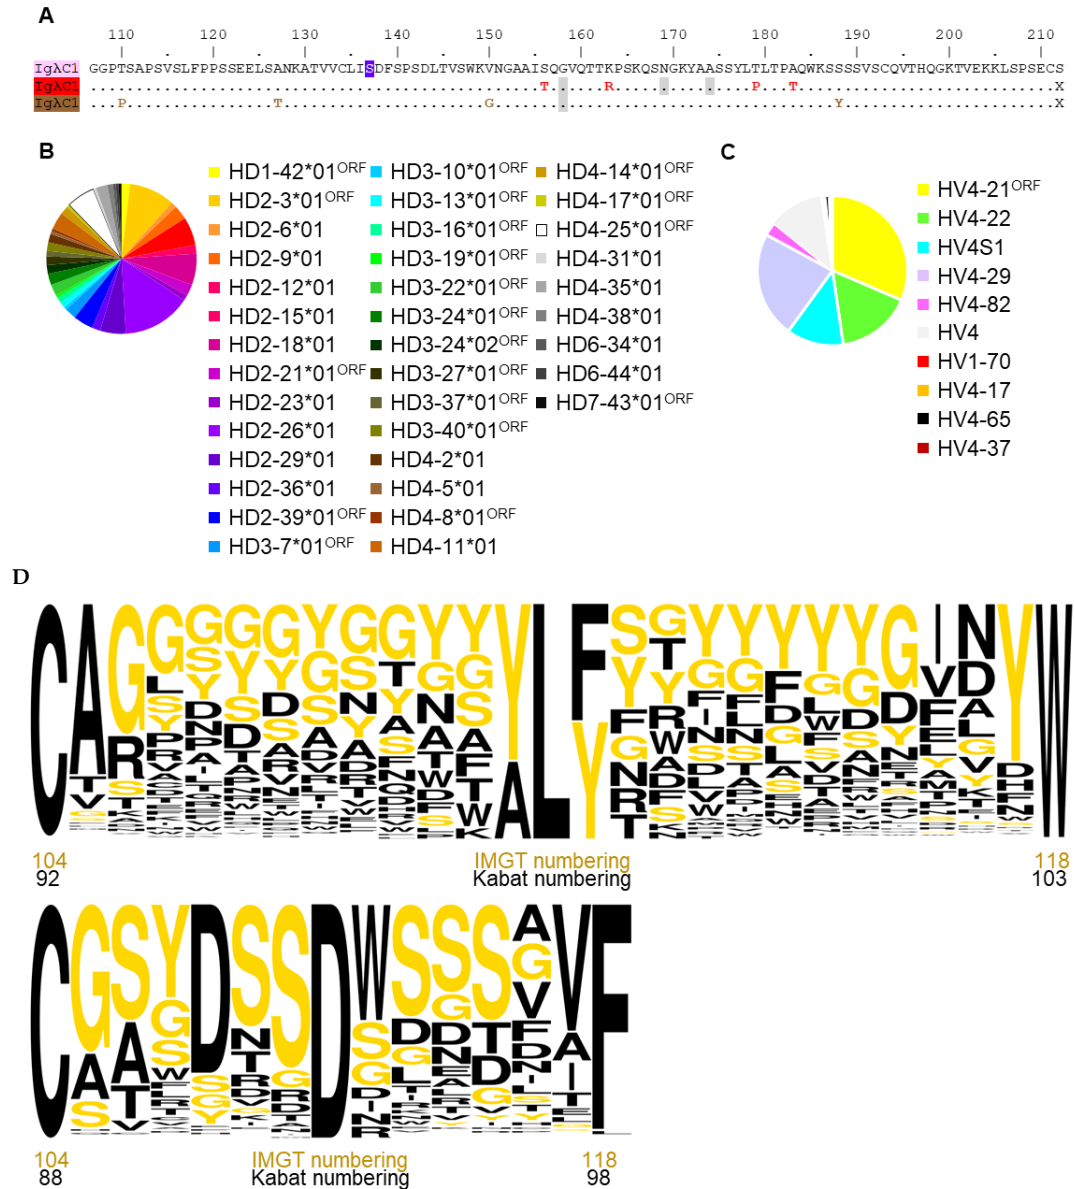

**Supplementary Figure S1** (A) Alignment of the IgλC1 alleles identified in this study. Amino acid differences are indicated with the coloured letters, while synonymous mutations to cytosine are highlighted in grey. (B) IgHD pie chart from Figure 2E, with labels. (C) NCBI IgHV-gene data from Resenfeld et al., reanalysed here for comparison to the recently described IMGT® genes/alleles. Analysis showed a similar HV4-21, HV4-22, HV4S1, HV4-29, and HV4-82 distribution to our own data. The HV4 (light grey) slice includes these same genes but could not be called by IMGT® and requires manual curation, owing to the high similarity between these five HV genes. (D) Logograms from Figure 2H and 2I, not accounting for gaps to better show amino acids composition.
